# Supplementary material
Source: Springer Nature journal article supplement (https://www.springermedizin.de/resource/supplementary/12889_2012_3965_MOESM3_ESM.PDF/9491060)
Supplement: MOESM3 [file 9491060]

Additional file 3. Summary of behavioural goals, determinants addressed, and strategies used in the meetings for significant others of *PTWD*

| <b>Behavioural goals</b>                                                                                                                                | <b>Main determinants addressed</b>                           | <b>Strategies (programme components)</b>                                                                               |
|---------------------------------------------------------------------------------------------------------------------------------------------------------|--------------------------------------------------------------|------------------------------------------------------------------------------------------------------------------------|
| SOs know what diabetes is and how to optimally manage it (monitoring of blood glucose, medication adherence, diet, physical activity)                   | Knowledge                                                    | Interactive diabetes quiz<br>Repetition of information                                                                 |
| SOs believe that the DSM of the diabetic patient is a shared responsibility                                                                             | Moral norms and outcome expectations                         | Positive role-model stories<br>Shared positive experiences of other SOs (vicarious reinforcement)<br>Group discussions |
| SOs regularly inquire how things are going with the management of diabetes (monitoring of blood glucose, medication adherence, diet, physical activity) | Social influences<br>Perceived norms and social expectations | Role-model stories<br>Letter of the week<br>Rehearsal situations<br>Group discussions                                  |
|                                                                                                                                                         | Moral norms and outcome expectations                         | Positive role-model stories<br>Shared positive experiences of other SOs (vicarious reinforcement)<br>Group discussions |
|                                                                                                                                                         | Self-efficacy and (communication) skills                     | Letter of the week<br>Rehearsal situations                                                                             |

|                                                                                                                                                                                                |                                          |                                                                                                                                             |
|------------------------------------------------------------------------------------------------------------------------------------------------------------------------------------------------|------------------------------------------|---------------------------------------------------------------------------------------------------------------------------------------------|
| <p>If the DSM is going well, the SO gives compliments to the diabetic patient</p> <p>If the diabetic patient is experiencing difficulties with his/her DSM, the SO gives positive feedback</p> | Outcome expectations                     | <p>Positive role-model stories</p> <p>Shared positive experiences from group members (vicarious reinforcement)</p> <p>Group discussions</p> |
|                                                                                                                                                                                                | Self-efficacy and (communication) skills | <p>Letter of the week</p> <p>Rehearsal situations</p>                                                                                       |
|                                                                                                                                                                                                | Perceived norms and social expectations  | <p>Role-model stories</p> <p>Letter of the week</p> <p>Rehearsal situations</p> <p>Group discussions</p>                                    |

DSM: diabetes self-management

SO: significant other
